# Supplementary material for: The effect of increased femoral anteversion on the morphological and trabecular microarchitectural changes in the trochlea in an immature rabbit
Source: PubMed Central journal article supplement — J Adv Res. 2020 Feb 13;23:143–9. doi: 10.1016/j.jare.2020.02.002 (PMC7038455; doi:10.1016/j.jare.2020.02.002), 2020-02-13

# 动物实验伦理审查表

## The Tab of Animal Experimental Ethical Inspection

|                                 |                                                                                                                                                                                                                                                                                                                                                                                                                                                                                                                                                                                                                                                                                                                                                |                    |            |
|---------------------------------|------------------------------------------------------------------------------------------------------------------------------------------------------------------------------------------------------------------------------------------------------------------------------------------------------------------------------------------------------------------------------------------------------------------------------------------------------------------------------------------------------------------------------------------------------------------------------------------------------------------------------------------------------------------------------------------------------------------------------------------------|--------------------|------------|
| 申请日期<br>(Date)                  | 2018-03-02                                                                                                                                                                                                                                                                                                                                                                                                                                                                                                                                                                                                                                                                                                                                     | 项目受理号<br>(No.)     | Z2018-15-1 |
| 姓名<br>(Name)                    | 康慧君                                                                                                                                                                                                                                                                                                                                                                                                                                                                                                                                                                                                                                                                                                                                            | 科室<br>(Department) | 关节一科       |
| 实验名称<br>(Study title)           | 增大股骨前倾导致髌骨脱位的实验研究<br>A model of patellar dislocation by increasing femoral anteversion                                                                                                                                                                                                                                                                                                                                                                                                                                                                                                                                                                                                                                                         |                    |            |
| 审查依据<br>(Inspection contents)   | 1. 该项目是否必须用实验动物进行实验, 即能否用计算机模拟、细胞培养等非生命方法替代动物或用低等动物替代高等动物进行实验 (Does laboratory animal must be used in the project? Could other methods such as computer simulation, cell cultivation or using the low-grade animal instead of the high-grade animal?)<br>2. 表中所填申请人资格和所用动物的品种品系、质量等级、规格是否合适, 能否通过改良设计方案或用高质量的动物来减少所用动物的数量 (Are the qualification of applicant, species or strain, grade and specifications of animals suitable? Could the quantity of animals be reduced by improving the study design or using high quality animals?)<br>3. 能否通过改进实验方法、调整实验观测指标、改良处死动物的方法, 来优化实验方案、善待动物 (Could the study design and animal treatment be refined by ameliorating experimental method, adjusting observational index, executing animal method?) |                    |            |
| 审查结果<br>(Results of inspection) | 伦理委员会委员意见 (Inspection by members in The Medical Ethics Committee) :<br><br><br><div style="text-align: right;">                     委员签字: <br/>                     日期: 2018-04-09                 </div>                                                                                                                                                                                                                                                                                                                                                                                                                                                 |                    |            |
|                                 | 伦理委员会意见 (Inspection by The Medical Ethics Committee) :<br><br><br><div style="text-align: right;"> <br/>                     主任委员签字: <br/>                     日期: 2018-04-09                 </div>                                                                                                                                                                                                                                                                                                                                                                  |                    |            |

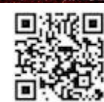

Supplement: mmc3.pdf [file mmc3.pdf]
